# Supplementary material
Source: PubMed Central journal article supplement (PMC5791153)

**Figure S1: Slc1a3-CreER marks the Henle's and Huxley's layers of the IRS.** Immunostaining with K6 and AE15 are shown in higher magnification. Scale bars, 10  $\mu\text{m}$ . IRS, inner root sheath; Cp, companion layer; He, Henle's layer; Hu, Huxley's layer; Ci, cuticle of IRS.

**Figure S2: Quantification of Slc1a3-CreER marked cells.** (a, b) Fraction of tdTomato<sup>+</sup> cells in indicated cell types. Data have been obtained from 3 mice per condition; data from each mouse are shown as an individual bar. Numbers of cells counted for each cell type are shown in (d, e). (c) Confocal images were used to quantify 20 different follicles from 3 different mice and data are plotted as average percentage. PD, postnatal day; ORS, outer root sheath; Cp, companion layer; IRS, inner root sheath; He, Henle's layer; Hu, Huxley's layer; Ci, cuticle of IRS; HS, hair shaft; HG, hair germ.

**Figure S3: Lineage tracing of Slc1a3-CreER marked cells.** (a-c) Confocal images showing individual Z-stack of thickness (0.45 - 1  $\mu\text{m}$ ) at different depth of 14  $\mu\text{m}$  section. Selected Z-stacks for top and bottom view from left to right are shown. (d) 3D projected images for all the Z-stacks are shown. (e) Telogen skin from Slc1a3-CreER/Rosa-tdTomato mice with or without Tamoxifen injections. Arrow represents tdTomato<sup>+</sup> clone in the inter-follicular epidermis. Scale bars, 50  $\mu\text{m}$ .

**Figure S1**

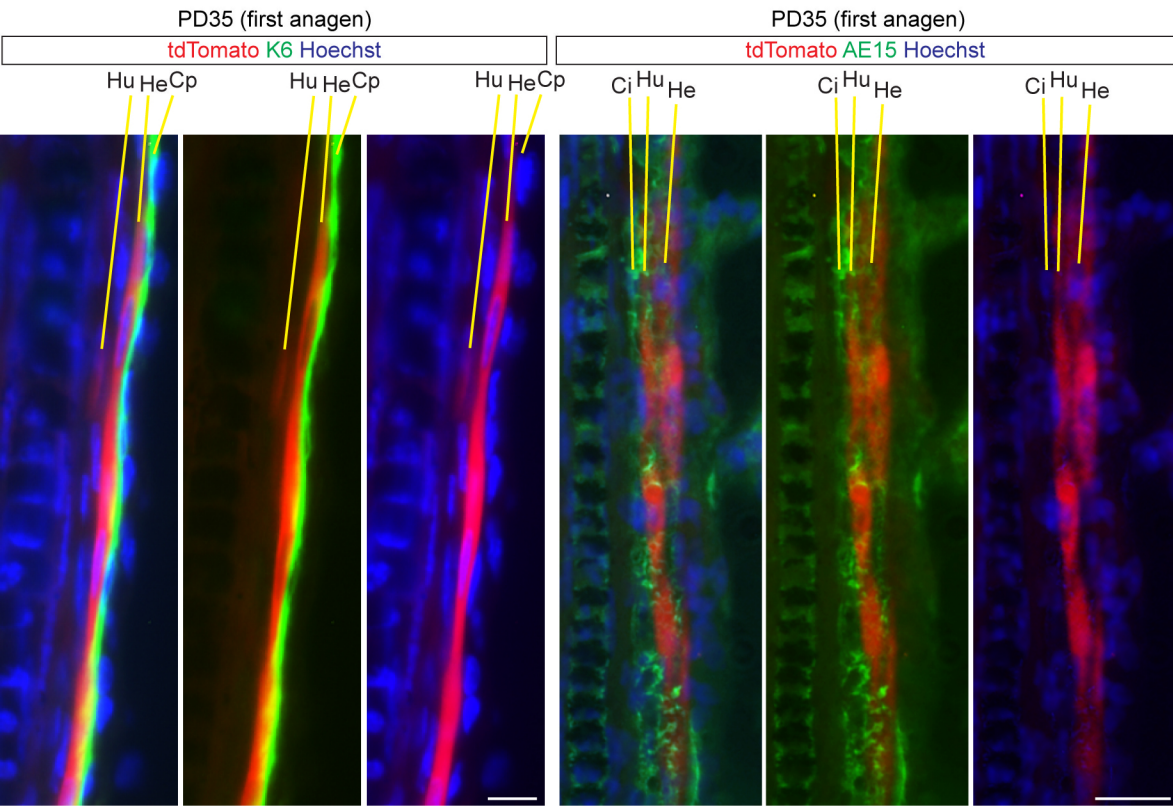

# Figure S2

**a** PD35 (first anagen)

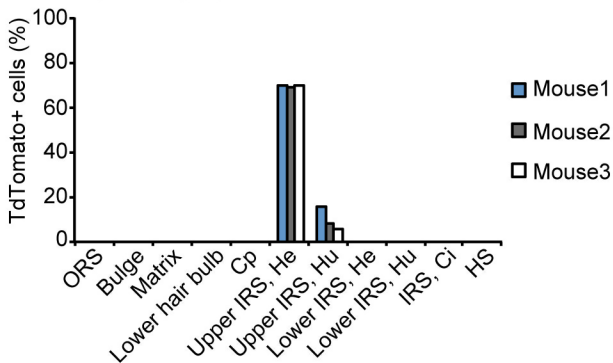

**b** PD49 (second telogen)

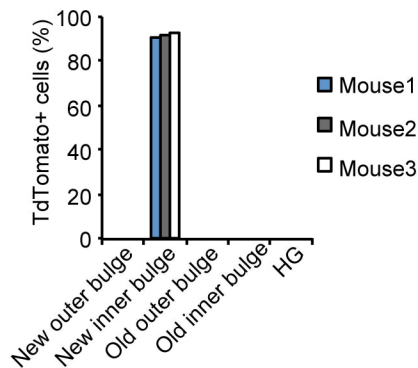

**c** PD49 (second telogen)

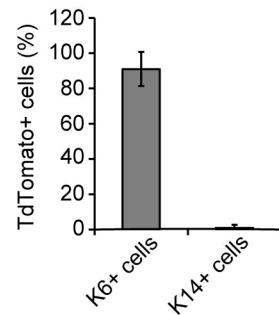

**d** PD35 (first anagen), # of cells counted

|        | ORS  | Bulge | Matrix | Lower hair bulb | Cp  | Upper IRS, He | Upper IRS, Hu | Lower IRS, He | Lower IRS, Hu | IRS, Ci | HS  |
|--------|------|-------|--------|-----------------|-----|---------------|---------------|---------------|---------------|---------|-----|
| Mouse1 | 1052 | 144   | 501    | 112             | 369 | 368           | 312           | 140           | 119           | 118     | 661 |
| Mouse2 | 507  | 48    | 114    | 14              | 88  | 192           | 152           | 72            | 82            | 124     | 220 |
| Mouse3 | 318  | 67    | 68     | 13              | 39  | 165           | 120           | 23            | 27            | 78      | 94  |

**e** PD49 (second telogen), # of cells counted

|        | New outer bulge | New inner bulge | Old outer bulge | Old inner bulge | HG  |
|--------|-----------------|-----------------|-----------------|-----------------|-----|
| Mouse1 | 174             | 156             | 117             | 47              | 63  |
| Mouse2 | 344             | 380             | 174             | 161             | 138 |
| Mouse3 | 102             | 208             | 45              | 61              | 29  |

# Figure S3

**a** PD35 (second catagen)

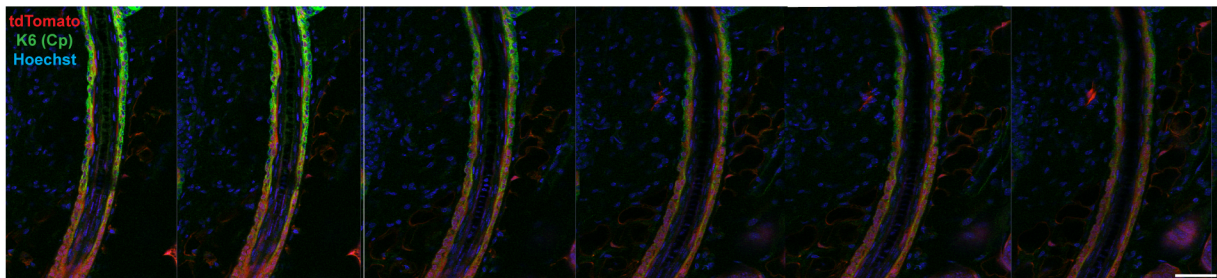

**b** PD49 (second telogen)

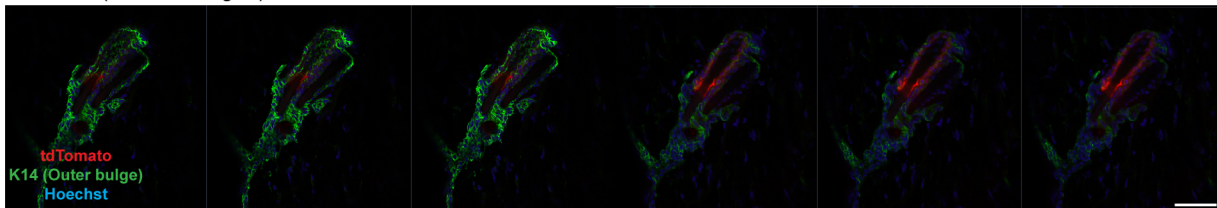

**c** PD49 (second telogen)

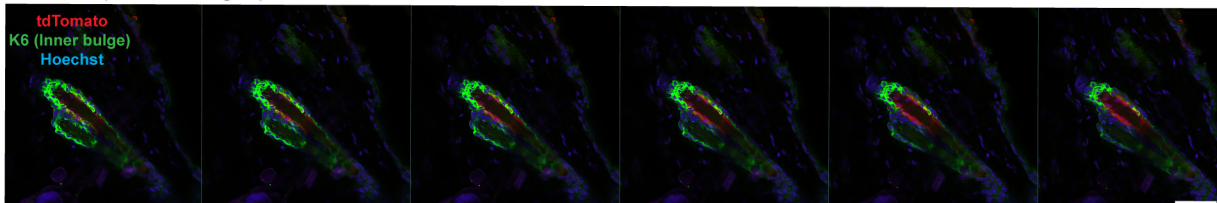

**d** PD49 (second telogen)

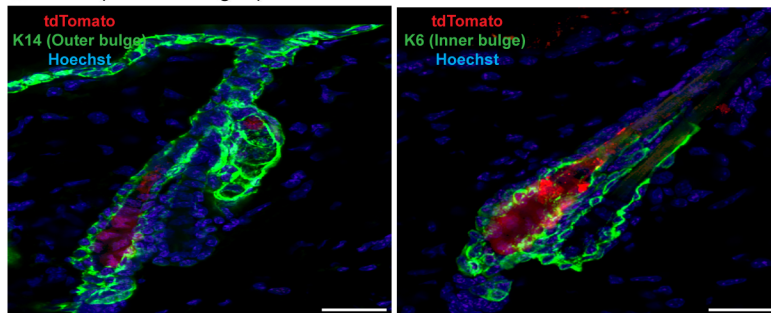

**e** PD49 (second telogen)

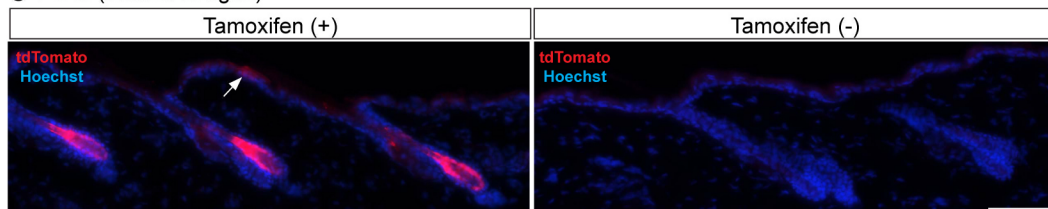

Supplement: NIHMS936231-supplement-Spplement.pdf [file NIHMS936231-supplement-Spplement.pdf]
